# Supplementary material for: Enhancing Arsenic Solidification/Stabilisation Efficiency of Metallurgical Slag-Based Green Mining Fill and Its Structure Analysis
Source: MDPI journal article supplement (doi:10.3390/met11091389), 2021-09-01
Supplement: s1 [file s1]

## Supplementary information

# Enhancing Arsenic Solidification/Stabilisation Efficiency of Metallurgical Slag-Based Green Mining Fill and Its Structure Analysis

Wei Gao <sup>1,2,3</sup>, Zifu Li <sup>1,2,3</sup>, Siqi Zhang <sup>2,3,4,\*</sup>, Yuying Zhang <sup>2,3,4</sup>, Pingfeng Fu <sup>2,3,4</sup>, Huifen Yang <sup>2,3,4</sup> and Wen Ni <sup>2,3,4,\*</sup>

<sup>1</sup> School of Energy and Environmental Engineering, University of Science and Technology Beijing, Beijing 100083, China; 15201455635@163.com (W.G.); zifulee@aliyun.com (Z.L.)

<sup>2</sup> Key Laboratory of High-efficient Mining and Safety of Metal Mines, Ministry of Education, Beijing 100083, China

<sup>3</sup> Key Laboratory of Resource-oriented Treatment of Industrial Pollutants, Beijing 100083, China

<sup>4</sup> School of Civil and Resource Engineering, University of Science and Technology Beijing, Beijing 100083, China; yuying.zhang@polyu.edu.hk (Y.Z.); pffu@ces.ustb.edu.cn (P.F.); yanghf@ustb.edu.cn (H.Y.)

\* Correspondence: zsq2017@ustb.edu.cn (S.Z.); niwen@ces.ustb.edu.cn (W.N.); Tel.: +86 186 0128 3010 (S.Z.).

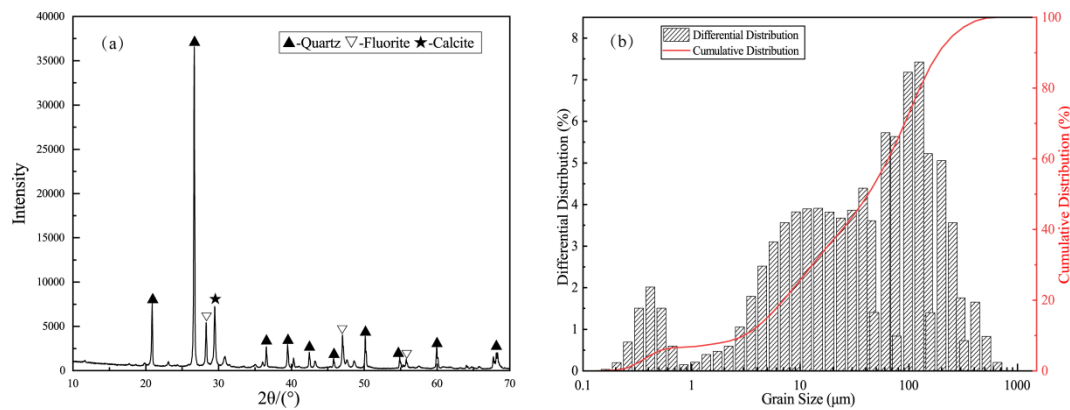

**Figure S1.** (a) XRD pattern and (b) grain size results of tailings.

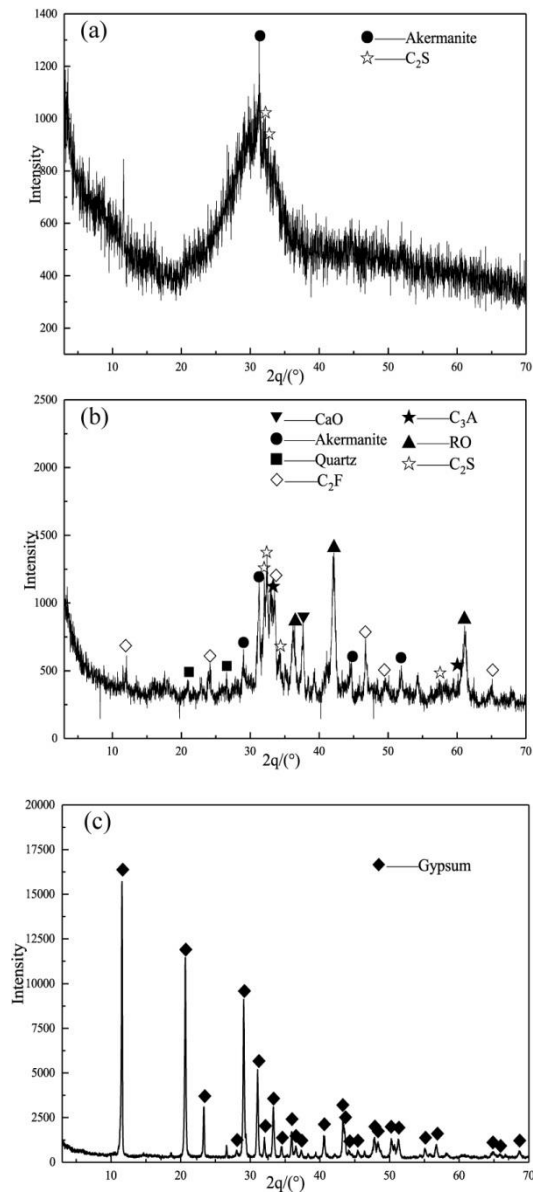

**Figure S2.** The XRD pattern of raw materials: (a) ground granulated blast furnace slag (GGBFS), C<sub>2</sub>S: dicalcium silicate; (b) steel slag powder (SSP), C<sub>3</sub>A: tricalcium aluminate, RO phase:  $(\text{MgO})_{0.239}(\text{FeO})_{0.761}$ , C<sub>2</sub>S: dicalcium silicate, C<sub>2</sub>F: dicalcium ferrite; (c) flue gas desulfurization gypsum (FGDG).

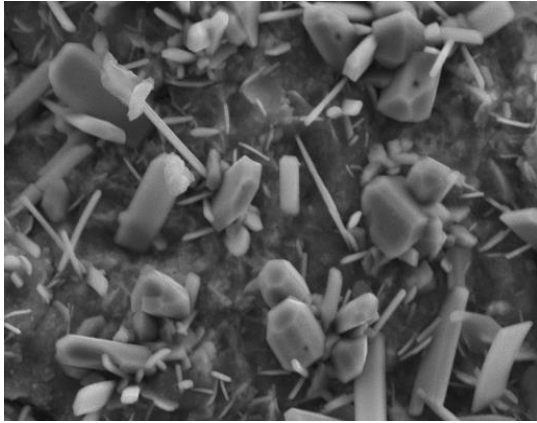

(a)

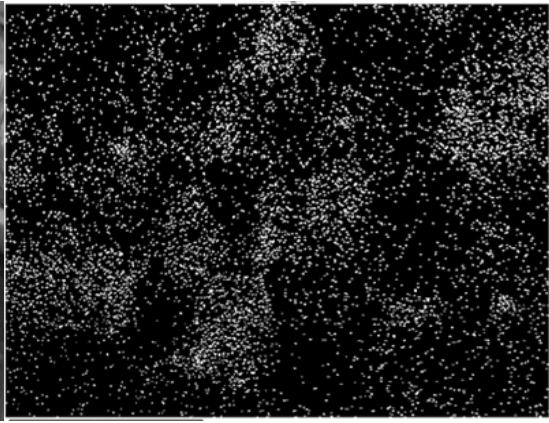

(b)As

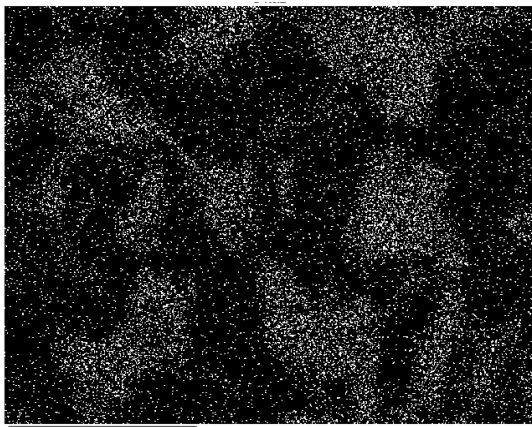

(c)S

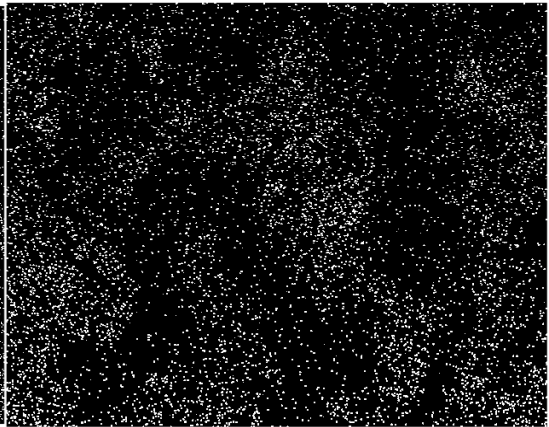

(d)Al

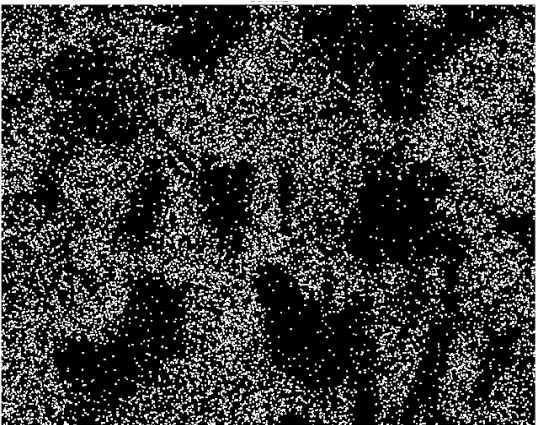

(e)Ca

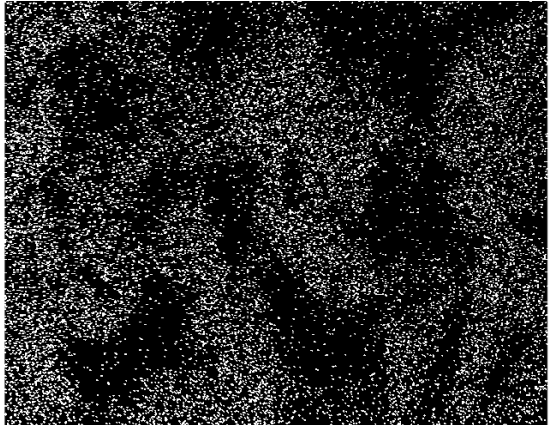

(f)Si

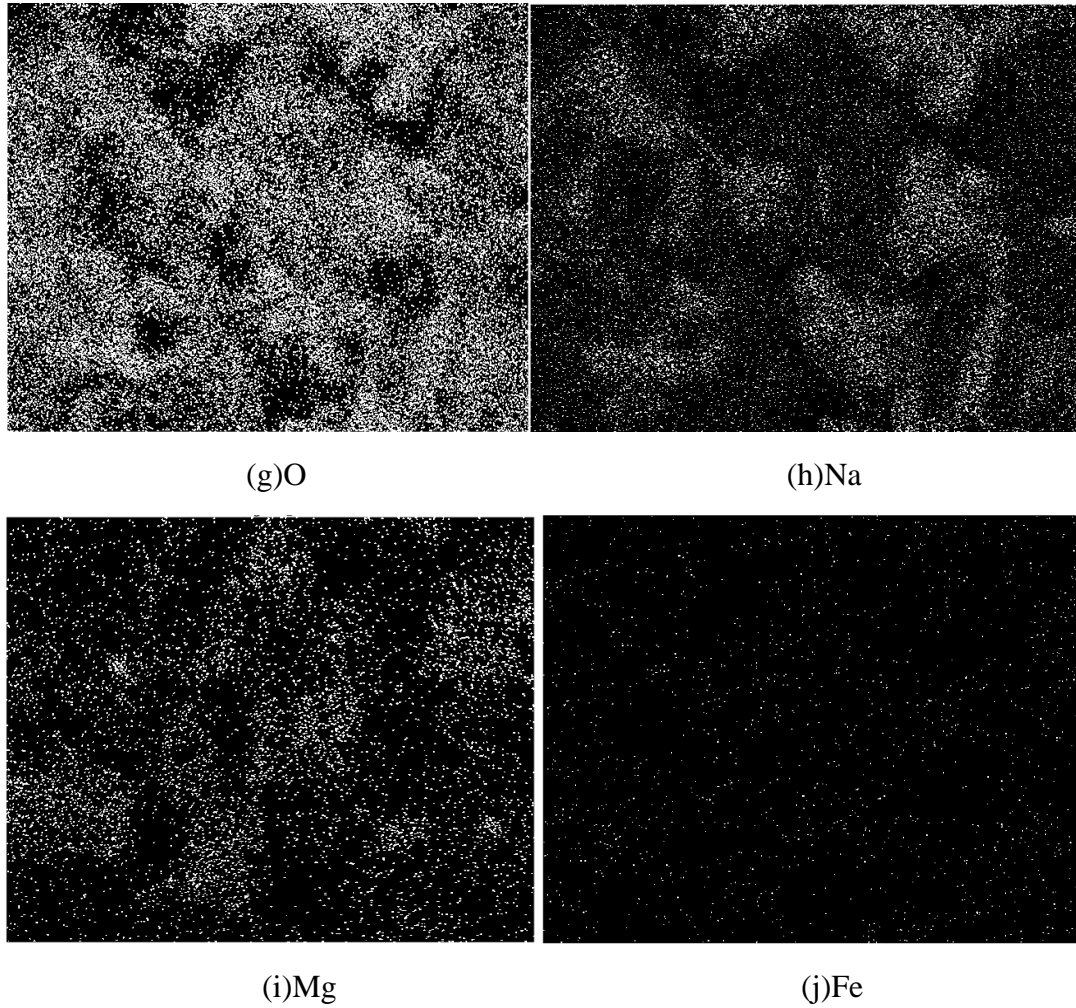

**Figure S3.** The SEM-EDS electron image and mapping images of Figure 4 (d).

**Table S1.** Leached concentration of raw materials and T in Table 2.

|                       | Cr    | Cu     | Zn    | As    | Cd      | Pb     |
|-----------------------|-------|--------|-------|-------|---------|--------|
| Tailings <sup>1</sup> | 6.54  | 154.20 | 1544  | 2098  | 2098.49 | 110.86 |
| Tailings <sup>2</sup> | ND    | ND     | 1.21  | 0.57  | ND      | 0.007  |
| GGBFS <sup>2</sup>    | 0.014 | ND     | ND    | ND    | ND      | ND     |
| SSP <sup>2</sup>      | 0.003 | ND     | 0.004 | ND    | ND      | ND     |
| FGDG <sup>2</sup>     | ND    | ND     | ND    | ND    | ND      | ND     |
| T <sup>2</sup>        | ND    | ND     | 0.02  | 0.031 | ND      | ND     |
| Detection limit       | 0.001 | 0.001  | 0.001 | 0.004 | 0.0002  | 0.004  |

ND: not detected as the concentrations were below the method detection limit.

<sup>1</sup> The heavy metal concentrations of tailings according to the Chinese standard method HJ 803-2016 (mg/kg).

<sup>2</sup> The leaching heavy metal concentrations according to the Chinese standard method HJ 557-2010 (mg/L).

**Table S2.** Component analysis result of point in the Figure 4 (at%).

| Notation | O     | Na    | Mg   | Al   | S     | Ca    | Si    | As   |
|----------|-------|-------|------|------|-------|-------|-------|------|
| b-1      | 69.02 | 1.36  | 2.81 | 4.55 | 3.25  | 11.53 | 5.2   | -    |
| b-2      | 68    | 1.31  | 0.93 | 5.15 | 7.13  | 15.11 | 2.28  | -    |
| b-3      | 59.93 | 1.37  | 0.91 | 6.17 | 7.91  | 18.68 | 3.72  | -    |
| c-1      | 54.79 | 28.28 | -    | 0.62 | 13.37 | 1.85  | 1.09  | -    |
| c-2      | 49.14 | 21.28 | 0.75 | 1.53 | 10.29 | 11.5  | -     | 0.55 |
| c-3      | 53.25 | 28.33 | -    | 1.05 | 14.1  | 1.92  | 1.36  | -    |
| d-1      | 49.66 | 32.53 | -    | -    | 17.81 | -     | -     | 0.61 |
| d-2      | 51.13 | 33.48 | -    | -    | 15    | -     | -     | -    |
| d-3      | 42.82 | 28.16 | 1.4  | 1.36 | 10.99 | 2.42  | 2.21  | -    |
| e-1      | 48.9  | 13.08 | 1.88 | 3.98 | 10.41 | 16.08 | 4.81  | 0.86 |
| e-2      | 55.43 | 10.22 | 3.38 | 3.45 | 8.63  | 10.99 | 6.01  | 1.88 |
| e-3      | 52.33 | 25.59 | -    | 0.6  | 13.55 | 5.08  | 2.12  | 0.72 |
| e-4      | 46.37 | 1.73  | --   | 0.91 | 6.74  | 1.52  | 25.08 | 16.3 |
| f-1      | 68.4  | -     | -    | 4.16 | 7.11  | 17.5  | 1.04  | 0.94 |
| f-2      | 67.44 | -     | -    | 5.48 | 7.27  | 14.69 | 1.58  | 3.48 |
| f-3      | 46.77 | 31.94 | -    | 0.09 | 19.83 | 1.37  | -     | -    |

**Table S3.** Component analysis result of point in the Figure 5 (at%).

| Notation | O     | Na    | Mg   | Al   | S     | Ca    | Si   | As   |
|----------|-------|-------|------|------|-------|-------|------|------|
| c-1      | 59.72 | 4.42  | 1.63 | 1.92 | 1.22  | 28.85 | 1.16 | 1.08 |
| d-1      | 50.74 | 27.46 | 0.24 | 0.94 | 10.93 | 4.57  | 2.49 | 0.61 |
| d-2      | 49.5  | 30.15 | 2.02 | 1.84 | 10.11 | 3.62  | 2.75 | 0.84 |
| e-1      | 65.55 | 3.25  | 0.61 | 5.87 | 3.71  | 15.62 | 3.56 | 1.54 |
| e-2      | 68.46 | 1.76  | -    | 8.29 | 5.27  | 15.67 | -    | 0.55 |

**Table S4.** Assessment summary of S/S performance effects of Na<sub>2</sub>SO<sub>4</sub>, NaOH, Ca(NO<sub>3</sub>)<sub>2</sub> and Ca(OH)<sub>2</sub> at different doses (wt%).

| Curing          | Na <sub>2</sub> SO <sub>4</sub> |      |       | NaOH  |       |       | Ca(NO <sub>3</sub> ) <sub>2</sub> |       |       | Ca(OH) <sub>2</sub> |       |       |
|-----------------|---------------------------------|------|-------|-------|-------|-------|-----------------------------------|-------|-------|---------------------|-------|-------|
|                 | 5%                              | 10%  | 15%   | 5%    | 10%   | 15%   | 5%                                | 10%   | 15%   | 5%                  | 10%   | 15%   |
| 28d             |                                 |      |       |       |       |       |                                   |       |       |                     |       |       |
| UCS (%)         | -1.8                            | -11  | -23.3 | -7.5  | -66.2 | -77.3 | -1.2                              | -13.5 | -28.2 | +5.5                | +19.6 | +25.7 |
| Curing Rate (%) | -7.2                            | -8.4 | -14.7 | -17.7 | -31.4 | -73.8 | -3.1                              | -6    | -9.1  | +2.8                | +5.3  | +5.8  |
| pH (%)          | -0.7                            | -0.5 | -0.6  | +11.5 | +12.4 | +15.8 | -0.6                              | -0.7  | -0.5  | +0.5                | +1.6  | +4.6  |

“+”: increased; “-”: decreased.
